# Supplementary material for: Urine Biomarkers Individually and as a Consensus Model Show High Sensitivity and Specificity for Detecting UTIs
Source: Preprints.org preprint supplement (doi:10.20944/preprints202307.0113.v1), 2023-07-03
Supplement: Supplementary file 1 [file supplementary]

Article Supplemental Materials

Urine Biomarkers Individually and as a Consensus Model Show High Sensitivity and Specificity for Detecting UTIs

Marzieh Akhlaghpour1, Emery Haley2, Laura Parnell3, Natalie Luke2, Mohit Mathur4, Richard Festa1, Michael Percaccio1, Jesus Magallon1, Mariana Remedios-Chan1, Alain Rosas1, Jimin Wang5, Yan Jiang5, Lori Anderson6, David Baunoch1*

| **Citation:** To be added by editorial staff during production.  Academic Editor: Firstname Lastname  Received: date  Revised: date  Accepted: date  Published: date  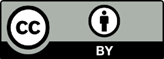  **Copyright:** © 2023 by the authors. Submitted for possible open access publication under the terms and conditions of the Creative Commons Attribution (CC BY) license (https://creativecommons.org/licenses/by/4.0/). |
| --- |

1Department of Research and Development, Pathnostics, 15545 Sand Canyon Suite 100, Irvine, CA, USA 92618

2Department of Clinical Research, Pathnostics, 15545 Sand Canyon Suite 100, Irvine, CA, USA 92618

3Department of Scientific Writing, Precision Consulting, 6522 Harbor Mist, Missouri City, TX, USA 77459

4Department of Medical Affairs, Pathnostics, 15545 Sand Canyon Suite 100, Irvine, CA, USA 92618

5Department of Statistical Analysis, Stat4Ward, 2 Edgemoor Lane, Pittsburgh, PA, USA 15238

6Department of Diagnostic Market Access, Pathnostics, 15545 Sand Canyon Suite 100, Irvine, CA, USA 92618

*****Correspondence: dbaunoch@pathnostics.com; Tel.: 714-966-1221.

1. Supplemental Materials

**Supplemental Table S1**. ICD-10-CM codes for the symptomatic cohort.

| **ICD-10-CM Code** | **Code Description** | **Frequency** | **Percent** |
| --- | --- | --- | --- |
| N39.0 | Urinary tract infection, site not specified | 534 | 81.8 |
| R30.0 | Dysuria | 43 | 6.6 |
| R31.0 | Gross hematuria | 25 | 3.8 |
| Z87.440 | Personal history of diseases of urinary system | 5 | 0.8 |
| R31.9 | Hematuria, unspecified | 4 | 0.6 |
| R82.998 | Other abnormal findings in urine | 4 | 0.6 |
| Others | - | 38 | 12.4 |

Some patients had more than one ICD-10-CM code associated with their case. The five most prevalent codes are listed individually and all remaining codes were grouped together as “other”.

**Supplemental Table S2**. Sensitivity and specificity of candidate biomarkers.

|  | **MMP-9** | **NGAL** | **IL-8** | **IL-6** | **IL-1β** |
| --- | --- | --- | --- | --- | --- |
| **Sensitivity** | 70.59 | 85.29 | 100 | 50 | 85.29 |
| **Specificity** | 85.19 | 85.19 | 51.85 | 70.37 | 85.19 |

Criterion 1, Biomarker Positivity Performance Using Microbial Density Detection ≥ 10, 000 cells/mL by M-PCR and CFUs/mL by SUC.

*Biomarker and microbial comparison defined by combinations of two biomarkers (NGAL & IL-8, NGAL & IL-1β, IL-8 & IL-1β)* – NGAL and IL-8 was positive in 80.3% of Definitive UTIs and negative in 91.7% of Definitive Non-UTIs (Supplemental Table S3A). NGAL and IL-1β was positive in 66.4% of Definitive UTIs and negative in 96.9% of Definitive non-UTIs (Supplemental Table S3B). IL-8 and IL-1β was positive in 69.5% of Definitive UTIs and negative in 97.4% of Definitive non-UTIs (Supplemental Table S3C).

**Supplemental Table S3A**. NGAL and IL-8 Positivity Contingency Table

|  | **Definitive UTI** | **Definitive Non-UTI** | *Total* |
| --- | --- | --- | --- |
| **NGAL and IL-8 Positive** | 282 (48.7%) | 19 (3.3%) | *301 (52.0%)* |
| **NGAL and IL-8 Negative** | 69 (11.9%) | 209 (36.1%) | *339 (58.5%)* |
| *Total* | *351 (60.6%)* | *228 (39.4%)* | 579 (100%) |

**Supplemental Table S3B**. NGAL and IL-1β Positivity Contingency Table

|  | **Definitive UTI** | **Definitive Non-UTI** | *Total* |
| --- | --- | --- | --- |
| **NGAL and IL-1β Positive** | 233 (40.2%) | 7 (1.2%) | *240 (41.5%)* |
| **NGAL and IL-1β Negative** | 118 (20.4%) | 221 (38.2%) | *339 (58.5%)* |
| *Total* | *351 (60.6%)* | *228 (39.4%)* | 579 (100%) |

**Supplemental Table S3C**. IL-8 and IL-1β Positivity Contingency Table

|  | **Definitive UTI** | **Definitive Non-UTI** | *Total* |
| --- | --- | --- | --- |
| **IL-8 and IL-1β Positive** | 244 (42.1%) | 6 (1.0%) | *250 (43.2%)* |
| **IL-8 and IL-1β Negative** | 107 (18.5%) | 222 (38.3%) | *329 (56.8%)* |
| *Total* | *351 (60.6%)* | *228 (39.4%)* | 579 (100%) |

A statistical analysis summary of the three combinations of biomarkers is listed in Supplemental Table S4. The sensitivities of the dual combinations of biomarkers were statistically significantly different (p < 0.0001).

**Supplemental Table S4**. Combination of two biomarkers performance comparisons in the presence of microorganisms detected at both ≥ 104 cells/mL by M-PCR and ≥ 104 CFUs/mL by SUC.

| Definitive UTI versus Definitive Non-UTI | | | |
| --- | --- | --- | --- |
| ≥ 10,000 Cells/mL and CFUs/mL | **NGAL & IL-8** | **NGAL & IL-1β** | **IL-8 & IL-1β** |
| Sensitivity (95% CI) | 80.3% (75.8%, 84.4%) | 66.4% (61.2%, 71.3%) | 69.5% (64.4%, 74.3%) |
| Specificity (95% CI) | 91.7% (87.3%, 94.9%) | 96.9% (93.8%, 98.8%) | 97.4% (94.4%, 99.0%) |
| Positive Predictive Value (95% CI) | 93.7% (90.3%, 96.2%) | 97.1% (94.1%, 98.8%) | 97.6% (94.8%, 99.1%) |
| Negative Predictive Value (95% CI) | 75.2% (69.7%, 80.1%) | 65.2% (59.9%, 70.3%) | 67.5% (62.1%, 72.5%) |
| Accuracy | 84.8% (81.6%, 87.6%) | 78.4% (74.8%, 81.7%) | 80.5% (77.0%, 83.6%) |
| Definitive UTI Percentage | 60.6% | 60.6% | 60.6% |
| Positive Likelihood Ratio | 9.64 (6.25, 14.87) | 21.62 (10.39, 45.01) | 26.42 (11.96, 58.36) |
| Negative Likelihood Ratio | 0.21 (0.14, 0.33) | 0.35 (0.17, 0.72) | 0.31 (0.14, 0.69) |

***The Proportion Z-test comparison of sensitivity: *p*-value <0.0001

Criterion 2, Biomarker Positivity Performance Using Microbial Density Detection ≥ 100, 000 cells/mL by M-PCR and CFUs/mL by SUC.

Definitive UTI Percentage

Out of the 583 symptomatic subject specimens, bacterial detection ≥ 10,000 cells/mL by M-PCR and CFUs/mL by SUC occurred in 245 specimens. These 245 specimens were considered Definitive UTIs. The 228 asymptomatic subject specimens were considered Definitive non-UTIs regardless of microbial detection. Therefore, the Definitive UTI percentage defined by criterion 2 was 51.8% ((245/(245+228))*100).

Biomarker and microbial comparison defined by each biomarker

NGAL was positive (≥ 38 ng/mL) in 89.0% of Definitive UTIs and negative in 90.8% of Definitive non-UTIs (Supplemental Table S5A). IL-8 was positive (≥ 20.6 pg/mL) in 94.3% of Definitive UTIs and negative in 76.2% of Definitive non-UTIs (Supplemental Table S5B). IL-1β was positive (≥ 12.4 pg/mL) in 75.5% of Definitive UTIs and negative in 96.9% of Definitive non-UTIs (Supplemental Table S5C).

**Supplemental Table S5A**. NGAL Positivity Contingency Table for Criterion 2

|  | **Definitive UTI** | **Definitive Non-UTI** | *Total* |
| --- | --- | --- | --- |
| **NGAL Positive** | 218 (46.1%) | 21 (4.4%) | *239 (50.5%)* |
| **NGAL Negative** | 27 (5.7%) | 207 (43.8%) | *234 (49.5%)* |
| *Total* | *245 (51.8%)* | *228 (48.2%)* | 473 (100%) |

**Supplemental Table S5B**. IL-8 Positivity Contingency Table for Criterion 2

|  | **Definitive UTI** | **Definitive Non-UTI** | *Total* |
| --- | --- | --- | --- |
| **IL-8 Positive** | 231 (48.8%) | 53 (11.2%) | *284 (60.0%)* |
| **IL-8 Negative** | 14 (3.0%) | 175 (37.0%) | *189 (40.0%)* |
| *Total* | *245 (51.8%)* | *228 (48.2%)* | 473 (100%) |

**Supplemental Table S5C**. IL-1β Positivity Contingency Table for Criterion 2

|  | **Definitive UTI** | **Definitive Non-UTI** | *Total* |
| --- | --- | --- | --- |
| **IL-1β Positive** | 185 (39.1%) | 7 (1.5%) | *192 (40.6%)* |
| **IL-1β Negative** | 60 (12.6%) | 221 (46.7%) | *281 (59.4%)* |
| *Total* | *245 (51.8%)* | *228 (48.2%)* | 473 (100%) |

A statistical analysis summary of the three biomarkers is listed in Supplemental Table S6. The sensitivity of each biomarker was statistically different (p < 0.0001). IL-8 had the highest sensitivity (94.3%) while IL-1β had the highest specificity (96.9%).

**Supplemental Table S6**. Biomarker performance comparisons in the presence of microorganisms detected at both ≥ 105 cells/mL by M-PCR and ≥ 104 CFUs/mL by SUC.

| Definitive UTI versus Definitive Non-UTI | | | |
| --- | --- | --- | --- |
| ≥ 105 Cells/mL and CFUs/mL | **NGAL***** | **IL-8***** | **IL-1β***** |
| Sensitivity (95% CI) | 89.0% (84.4%, 92.6%) | 94.3% (90.6%, 96.8%) | 75.5% (69.6%, 80.8%) |
| Specificity (95% CI) | 90.8% (86.3%, 94.2%) | 76.8% (70.7%, 82.1%) | 96.9% (93.8%, 98.8%) |
| Positive Predictive Value (95% CI) | 91.2% (86.9%, 94.5%) | 81.3% (76.3%, 85.7%) | 96.4% (92.6%, 98.5%) |
| Negative Predictive Value (95% CI) | 88.5% (83.7%, 92.3%) | 92.6% (87.9%, 95.9%) | 78.6% (73.4%, 83.3%) |
| Accuracy | 89.9% (86.8%, 92.4%) | 85.8% (82.4%, 88.9%) | 85.8% (82.4%, 88.9%) |
| Definitive UTI Percentage | 51.8% | 51.8% | 51.8% |
| Positive Likelihood Ratio | 9.66 (6.41, 14.56) | 4.06 (3.2, 5.15) | 24.59 (11.82, 51.18) |
| Negative Likelihood Ratio | 0.12 (0.08, 0.18) | 0.07 (0.06, 0.09) | 0.25 (0.12, 0.53) |

***The Proportion Z-test comparison of sensitivity: *p*-value <0.0001

“Consensus” is defined as > biomarkers meeting or exceeding the positivity threshold. Consensus positivity occurred in 90.2% of Definitive UTIs and consensus negativity occurred in 91.2% of Definitive non-UTIs (Supplemental Table S7A). All three biomarkers were positive in 72.7% of Definitive UTIs and negative in 97.4% of Definitive non-UTIs (Supplemental Table S7B).

**Supplemental Table S7A**. Biomarker Consensus Positivity Contingency Table for Criterion 2

|  | **Definitive UTI** | **Definitive Non-UTI** | *Total* |
| --- | --- | --- | --- |
| **Consensus Positive** | 221 (46.7%) | 20 (4.2%) | *241 (51.0%)* |
| **Consensus Negative** | 24 (5.1%) | 208 (44.0%) | *232 (49.0%)* |
| *Total* | *245 (51.8%)* | *228 (48.2%)* | 473 (100%) |

**Supplemental Table S7B**. All Three Biomarkers Positivity Contingency Table for Criterion 2

|  | **Definitive UTI** | **Definitive Non-UTI** | *Total* |
| --- | --- | --- | --- |
| **All Three Positive** | 178 (37.6%) | 6 (1.3%) | *184 (38.9%)* |
| **Less Than Three Positive** | 67 (14.2%) | 222 (46.9%) | *289 (61.1%)* |
| *Total* | *245 (51.8%)* | *228 (48.2%)* | 473 (100%) |

A statistical analysis summary of the biomarker combinations is listed in Supplemental Table S8. The sensitivity of each biomarker combination was statistically significantly different (p < 0.0001). Although the combination of all three biomarkers being positive had the highest specificity (97.4%), it had relatively low sensitivity (72.7%). The consensus criteria with at least 2 biomarkers meeting or exceeding the positivity threshold performed well in terms of both sensitivity and specificity (90.2% and 91.2%, respectively).

**Supplemental Table S8**. Biomarker “Consensus” and triple combination performance comparisons in the presence of microorganisms detected at both ≥ 105 cells/mL by M-PCR and CFUs/mL by SUC.

| Definitive UTI versus Definitive Non-UTI | | |
| --- | --- | --- |
| ≥ 105 Cells/mL and CFUs/mL | **“Consensus”** | **“All three Biomarkers”** |
| Sensitivity (95% CI) | 90.2% (85.8%, 93.6%) | 72.7% (66.6%, 78.1%) |
| Specificity (95% CI) | 91.2% (86.8%, 94.6%) | 97.4% (94.4%, 99.0%) |
| Positive Predictive Value (95% CI) | 91.7% (87.5%, 94.9%) | 96.7% (93.0%, 98.8%) |
| Negative Predictive Value (95% CI) | 89.7% (85.0%, 93.3%) | 76.8% (71.5%, 81.6%) |
| Accuracy | 90.7% (87.7%, 93.2%) | 84.6% (81.0%, 87.7%) |
| Definitive UTI Percentage | 51.8% | 51.8% |
| Positive Likelihood Ratio | 10.28 (6.75, 15.66) | 27.61 (12.49, 61.03) |
| Negative Likelihood Ratio | 0.11 (0.07, 0.16) | 0.28 (0.13, 0.62) |

***The Proportion Z-test comparison of sensitivity: p-value <0.0001

*Biomarker and microbial comparison defined by combinations of two biomarkers (NGAL & IL-8, NGAL & IL-1β, IL-8 & IL-1β)*- NGAL and IL-8 was positive in 87.3% of Definitive UTIs and negative in 91.7% of Definitive non-UTIs (Supplemental Table S9A). NGAL and IL-1β was positive in 73.1% of Definitive UTIs and negative in 96.9% of Definitive non-UTIs (Supplemental Table S9B). IL-8 and IL-1β was positive in 75.1% of Definitive UTIs and negative in 97.4% of Definitive non-UTIs (Supplemental Table S9C).

**Supplemental Table S9A**. NGAL and IL-8 Positivity Contingency Table

|  | **Definitive UTI** | **Definitive Non-UTI** | *Total* |
| --- | --- | --- | --- |
| **NGAL and IL-8 Positive** | 214 (45.2%) | 19 (4.0%) | *233 (49.3%)* |
| **NGAL and IL-8 Negative** | 31 (6.6%) | 209 (44.2%) | *240 (50.7%)* |
| *Total* | *245 (51.8%)* | *228 (48.2%)* | 473 (100%) |

**Supplemental Table S9B**. NGAL and IL-1β Positivity Contingency Table

|  | **Definitive UTI** | **Definitive Non-UTI** | *Total* |
| --- | --- | --- | --- |
| **NGAL and IL-1β Positive** | 179 (37.8%) | 7 (1.5%) | *186 (39.3%)* |
| **NGAL and IL-1β Negative** | 66 (14.0%) | 221 (46.7%) | *287 (60.7%)* |
| *Total* | *245 (51.8%)* | *228 (48.2%)* | 473 (100%) |

**Supplemental Table S9C**. IL-8 and IL-1β Positivity Contingency Table

|  | **Definitive UTI** | **Definitive Non-UTI** | *Total* |
| --- | --- | --- | --- |
| IL-8 and IL-1β Positive | 184 (38.9%) | 6 (1.3%) | *190 (40.2%)* |
| IL-8 and IL-1β Negative | 61 (12.9%) | 222 (46.9%) | *283 (59.8%)* |
| *Total* | *245 (51.8%)* | *228 (48.2%)* | 473 (100%) |

A statistical analysis summary of the three combinations of biomarkers is listed in Supplemental Table S10. The sensitivities of the dual combinations of biomarkers were statistically significantly different (p < 0.0001).

**Supplemental Table S10**. Biomarker combination performance comparisons in the presence of microorganisms detected at both ≥ 105 cells/mL by M-PCR and CFUs/mL by SUC.

| Definitive UTI versus Definitive Non-UTI | | | |
| --- | --- | --- | --- |
| ≥ 105 Cells/mL and CFUs/mL | **NGAL & IL-8** | **NGAL & IL-1β** | **IL-8 & IL-1β** |
| Sensitivity (95% CI) | 87.3% (82.5%, 91.2%) | 73.1% (67.0%, 78.5%) | 75.1% (69.2%, 80.4%) |
| Specificity (95% CI) | 91.7% (87.3%, 94.9%) | 96.9% (93.8%, 98.8%) | 97.4% (94.4%, 99.0%) |
| Positive Predictive Value (95% CI) | 91.8% (87.6%, 95.0%) | 96.2% (92.4%, 98.5%) | 96.8% (93.3%, 98.8%) |
| Negative Predictive Value (95% CI) | 87.1% (82.2%, 91.1%) | 77.0% (71.7%, 81.7%) | 78.4% (73.2%, 83.1%) |
| Accuracy | 89.4% (86.3%, 92.1%) | 84.6% (81.0%, 87.7%) | 85.8% (82.4%, 88.9%) |
| Definitive UTI Percentage | 51.8% | 51.8% | 51.8% |
| Positive Likelihood Ratio | 10.48 (6.8, 16.16) | 23.8 (11.43, 49.54) | 28.54 (12.92, 63.06) |
| Negative Likelihood Ratio | 0.14 (0.09, 0.21) | 0.28 (0.13, 0.58) | 0.26 (0.12, 0.57) |

***The Proportion Z-test comparison of sensitivity: p-value <0.0001

**Supplemental Figure S1.** Asymptomatic Microbial Density. The bacterial density for each asymptomatic case as measured by M-PCR, with the median density (red line), at 239,611 cells/mL and the mean density of 2.8 x 107. Each individual dot within the figure represents a distinct specimen, highlighting the diverse range of densities observed within the dataset. This figure visually captures the variability and trends in bacterial densities within asymptomatic bacteriuria cases.

**Supplemental Table S11**. Asymptomatic Subjects with Positive Microbial Detection (> 10,000 CFU or cells/mL for bacteria/bacterial groups).

|  | SUC | |  | M-PCR | |
| --- | --- | --- | --- | --- | --- |
|  | n | % |  | n | % |
| Male | 11 | 20.4 |  | 21 | 18.3 |
| Female | 43 | 79.6 |  | 94 | 81.7 |
| Total n | 53 | |  | 115 | |
